# Supplementary material for: Differential expression of miRNAs related to caste differentiation in the honey bee, Apis mellifera
Source: Springer Nature journal article supplement (doi:10.1007/s13592-015-0389-3), 2015-11-20

# Differential expression of miRNAs related to caste differentiation in the honey bee, *Apis mellifera*

## Apidologie

Xiangqian Guo<sup>a,d,#</sup>, Songkun Su<sup>b,e,#</sup>, Skogerbø Geir<sup>a</sup>, Wenfeng Li<sup>b</sup>, Zhiguo Li<sup>e</sup>, Shaowu Zhang<sup>c,✉</sup>, Shenglu Chen<sup>b,✉</sup>, Runsheng Chen<sup>a,✉</sup>

<sup>a</sup>Bioinformatics Laboratory and National Laboratory of Biomacromolecules, Institute of Biophysics, Chinese Academy of Sciences, Beijing 100101, PR China

<sup>b</sup>College of Animal Sciences, Zhejiang University, Hangzhou 310027, China

<sup>c</sup>Research School of Biological Sciences, The Australian National University, Canberra ACT 0200, Australia

<sup>d</sup>Graduate School of the Chinese Academy of Science, Beijing 100080, PR China

<sup>e</sup>College of Bee Sciences, Fujian Agriculture and Forestry University, Fuzhou 350002, China

<sup>#</sup>These authors contributed equally to this work.

<sup>✉</sup>Corresponding authors.

Corresponding authors email addresses:

SZ: [shaowu.zhang@anu.edu.au](mailto:shaowu.zhang@anu.edu.au)

SC: [slchen@zju.edu.cn](mailto:slchen@zju.edu.cn)

RC: [crs@sun5.ibp.ac.cn](mailto:crs@sun5.ibp.ac.cn)

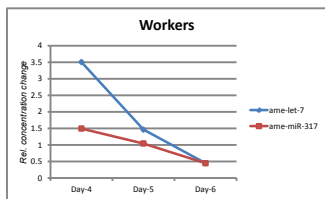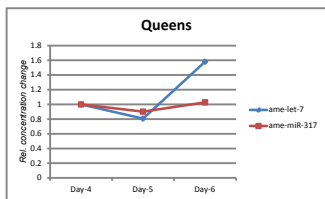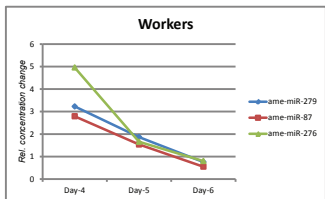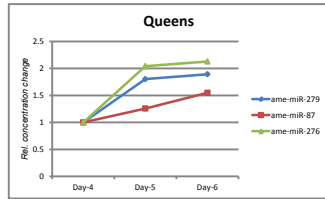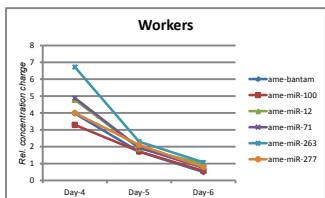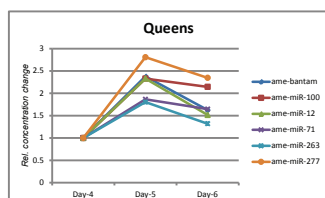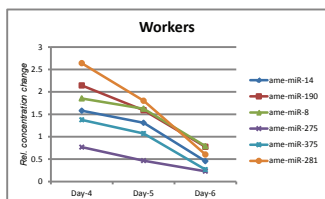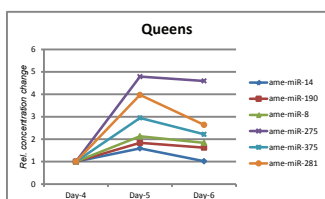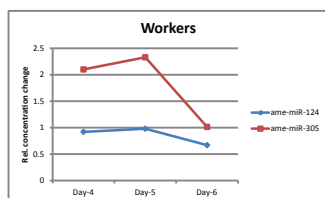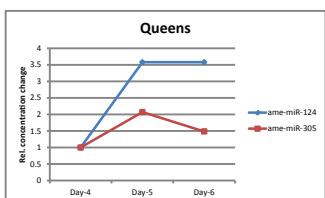

Supplement: MOESM7 [file 13592_2015_389_MOESM7_ESM.pdf]
